1 **Early sexual dimorphism in the developing gut microbiome of northern elephant seals**

2

3 Authors names and addresses:

4

5 Stoffel, M.A.<sup>1,2,3\*</sup>, Acevedo-Whitehouse, K.<sup>4,5+</sup>, Nami Morales-Durán<sup>4</sup>, Grosser, S.<sup>6</sup>, Chakarov, N.<sup>2</sup>, Krüger, O.<sup>2</sup>,  
6 Nichols, H.J.<sup>2,7</sup>, Elorriaga-Verplancken, F.R.<sup>8</sup>, Hoffman, J.I.<sup>2,9+</sup>

7 <sup>1</sup>Institute of Evolutionary Biology, University of Edinburgh, Edinburgh, EH9 3FL, United Kingdom

8 <sup>2</sup>Department of Animal Behaviour, Bielefeld University, Postfach 100131, 33501 Bielefeld, Germany

9 <sup>3</sup>School of Natural Sciences and Psychology, Faculty of Science, Liverpool John Moores University, Liverpool  
10 L3 3AF, United Kingdom

11 <sup>4</sup>Unit for Basic and Applied Microbiology, School of Natural Sciences, Autonomous University of Queretaro,  
12 Avenida de las Ciencias S/N, Queretaro 76230, México

13

14 <sup>5</sup>The Marine Mammal Center, 2000 Bunker Road, Sausalito, CA 94965, USA.

15 <sup>6</sup>Division of Evolutionary Biology, Faculty of Biology, LMU Munich, Planegg-Martinsried, Germany

16 <sup>7</sup>Swansea University, Department of Biosciences, College of Science, Swansea University SA2 8PP, UK

17 <sup>8</sup>Department of Fisheries and Marine Biology, Centro Interdisciplinario de Ciencias Marinas, Instituto Politécnico  
18 Nacional (CICIMAR-IPN), La Paz, Mexico.

19

20 <sup>9</sup>British Antarctic Survey, High Cross, Cambridge, UK

21

22

23

24

25 Key index words:

26 gut microbiome, development, sex differences, life-history, northern elephant seal, wild

27 <sup>+</sup> Shared senior authors

28 <sup>\*</sup> Corresponding author:

29 Martin A. Stoffel

30 Postal address: Institute of Evolutionary Biology, University of Edinburgh, Edinburgh, UK

31

32 E-mail: martin.adam.stoffel@gmail.com

33

## 34 **Abstract**

35 The gut microbiome is an integral part of a species' ecology, but we know little about how host characteristics  
36 impact its development in wild populations. Here, we explored the role of such intrinsic factors in shaping the gut  
37 microbiome of northern elephant seals during a critical developmental window of six weeks after weaning, when  
38 the pups stay ashore without feeding. We show that the early-life gut microbiome is already substantially different  
39 in male and female pups, even though males and females cannot yet be distinguished morphologically. Sex and  
40 age both explain around 15% of the variation in gut microbial beta diversity, while microbial communities sampled  
41 from the same individual show high levels of similarity across time, explaining another 40% of the variation. Only  
42 a small proportion of the variation in beta diversity is explained by health status, but healthy individuals have a  
43 greater microbial alpha diversity than their non-healthy peers. Across the post-weaning period, the elephant seal  
44 gut microbiome is highly dynamic. We found evidence for several colonisation and extinction events as well as a  
45 decline in *Bacteriodes* and an increase in *Prevotella*, a pattern that has previously been associated with the  
46 transition from nursing to solid food. Lastly, we show that genetic relatedness is correlated with gut microbiome  
47 similarity in males but not females, again reflecting substantial early sex-differences. Our study represents a  
48 naturally diet-controlled and longitudinal investigation of how intrinsic factors shape the early gut microbiome in  
49 a species with extreme sex differences in morphology and life history.

50

51

## 52 **Introduction**

53 Vertebrates are inhabited by vast numbers of microbes that are increasingly emerging as key players in their host's  
54 biology and evolution (Bik et al., 2016; Ley et al., 2008; McFall-Ngai et al., 2013; Moeller et al., 2014). The  
55 richest and arguably most complex microbial communities are those that populate the gastrointestinal tract and  
56 which are collectively termed the 'gut microbiome'. Gut microbes benefit their host in many ways, such as  
57 promoting the development of organs, assisting nutrient uptake and priming and modulating the immune system  
58 (Cheesman, Neal, Mittge, Seredick, & Guillemin, 2011; Heijtz et al., 2011; Lathrop et al., 2011; Zhu, Wu, Dai,  
59 Zhang, & Wei, 2011). Consequently, disturbances to the gut microbiome can have severe consequences for the  
60 host, ranging from autoimmune diseases and infections to obesity (Giongo et al., 2011; Round & Mazmanian,  
61 2009; Turnbaugh, Bäckhed, Fulton, & Gordon, 2008).

62

63 The gut microbiome is highly dynamic across space and time and can be influenced by many factors. On a broader  
64 scale, the strongest determinants of the gut microbiome appear to be phylogeny and diet, both of which can result  
65 in remarkably different bacterial communities across host species (Bik et al., 2016; Ley et al., 2008; Muegge et  
66 al., 2011). On a finer scale, differences in the gut microbiome within species can be shaped by a combination of  
67 environmental factors such as diet, location and season, behavioural factors such as social networks, and heritable  
68 factors such as host genetics (Benson et al., 2010; Kurilshikov, Wijmenga, Fu, & Zhernakova, 2017; Moeller et  
69 al., 2014; Ren et al., 2017; Tung et al., 2015). However, most studies to date have focused on animals held in  
70 captivity, which can influence microbial communities due to factors such as controlled and less diverse diets (Hird,  
71 2017). Consequently, relatively little is known about the composition, development and function of the gut  
72 microbiome in the wild, despite its potential to contribute to our fundamental understanding of the ecology and  
73 evolutionary biology of mutualistic symbiotic relationships (Hird, 2017; Zilber-Rosenberg & Rosenberg, 2008).

74  
75 The mammalian foetal gut is considered to be largely sterile, although there is recent evidence of uterine bacterial  
76 translocation to the foetus (Chen & Gur, 2019; Perez-Muñoz, Arrieta, Ramer-Tait, & Walter, 2017). During and  
77 after birth, the gut becomes rapidly colonised by various microbes. In these early stages of life, the gut microbiome  
78 is of tremendous importance and disturbances can impact host development and impair metabolism, health and  
79 immune function (Candon et al., 2015; Cho et al., 2012; Cox et al., 2014; Macpherson & Harris, 2004; Russell et  
80 al., 2012). It is therefore of interest to investigate changes in the microorganisms that populate the gut during an  
81 individual's development. Across the life-span of an organism, ontogeny appears to influence the composition of  
82 the gut microbiome in a species-specific manner (Clark et al., 2015; Langille et al., 2014; O'Toole & Jeffery,  
83 2015). For example, bacterial diversity increases throughout early development in humans, chickens, pigs and  
84 ostriches (Ballou et al., 2016; Frese, Parker, Calvert, & Mills, 2015; Kundu, Blacher, Elinav, & Pettersson, 2017;  
85 Videvall et al., 2019), but decreases during maturation in zebrafish and African turquoise killifish (Smith et al.,  
86 2017; Stephens et al., 2016). A mixed pattern has been observed in mice, where an early drop in diversity after the  
87 initial transmission of maternal microbiota is followed by an increase after the introduction of solid food (Pantoja-  
88 Feliciano et al., 2013). However, to our knowledge, patterns of microbial colonisation during early development  
89 in wild animals are as yet largely unknown (Ren et al., 2017).

90

91 Every species' life-history is characterised by a series of challenges to which an organism must adapt, both  
92 physiologically and behaviourally. A key element facilitating these adaptations might be the microbiome. A  
93 particularly strong factor driving within-species variation in microbial communities could be sex, as males and  
94 females often experience contrasting selection pressures due to differences in their behaviour and physiology  
95 (Tarka, Guenther, Niemelä, Nakagawa, & Noble, 2018). Several of these differences might be directly or indirectly  
96 associated with the gut microbiome, such as sex-specific immune responses (Klein & Flanagan, 2016) or sex-  
97 specific foraging behaviour (Boeuf et al., 2000; Boinski, 1988; Lewis et al., 2002). Surprisingly given the  
98 important role of sex-specific microbiota in humans (Markle et al., 2013), the impact of sex on the gut microbiome  
99 of wild vertebrates seems to be non-existent or very small (Bennett et al., 2016; Bobbie, Mykytczuk, & Schulte-  
100 Hostedde, 2017; Maurice et al., 2015; Ren et al., 2017; Tung et al., 2015). However, gut microbiome studies of  
101 wild populations are likely to be impacted by environmental factors that can rarely be controlled for and which  
102 could potentially mask any effects of intrinsic factors such as sex.

103

104 Another largely open question for natural populations is how host genotype affects the gut microbiome. Most  
105 insights to date come from twin studies in humans or from different strains of laboratory mice and suggest that the  
106 influence of host genetics is modest compared to environmental effects (Kurilshikov et al., 2017). However, most  
107 free-ranging animal populations carry greater levels of genetic variation than inbred laboratory stocks and their  
108 microbiota may also be more complex, which could potentially lead to stronger covariation between host genotype  
109 and microbial community composition. Nevertheless, quantifying the impact of host genetics on the gut  
110 microbiome in the wild is challenging, at least in part because of the need to control for environmental effects (Bik  
111 et al., 2016; Perofsky, Lewis, Abondano, Di Fiore, & Meyers, 2017; Tung et al., 2015) that may might blur any  
112 genetic signal. Consequently, it remains unclear whether host genetics influences the gut microbiome in natural  
113 populations, despite the importance of this question in the light of host-microbe evolution.

114

115 An ideal opportunity to investigate the intrinsic factors that shape the gut microbiome in the wild is provided by  
116 the northern elephant seal (*Mirounga angustirostris*). Northern elephant seals are among the most sexually  
117 dimorphic of all mammals, with males being 3-4 times heavier than females (Wilson & Mittermeier, 2014). The  
118 mating system of this species is highly polygynous, with only a handful of successful males copulating with dozens  
119 of females in a given season (Burney J. Le Boeuf & Laws, 1994). Consequently, males and females face very

120 different challenges: during the breeding season, males must continuously defend their harems against competitors,  
121 while females need to invest substantial amounts of energy into nursing their pups. Neither males nor females feed  
122 during the breeding season, with some males fasting for up to three months and females fasting for up to one  
123 month, despite the high energetic investment required to provide high-fat milk to their young (Burney J. Le Boeuf  
124 & Ortiz, 1977). Outside the breeding season, elephant seals spend most of their lives at sea, and even there, sex  
125 differences are apparent. Adult males and females have very different foraging strategies, with males feeding on  
126 benthic prey along the continental margin of North America, and females feeding largely on pelagic prey in deeper  
127 waters (Boeuf et al., 2000). Consequently, elephant seals have developed a series of sex-specific adaptations to  
128 these diverging life-histories, but it is not known yet whether or how the gut microbiome might be involved.

129  
130 Here, we studied the gut microbiome of elephant seal pups over a 35-day post-weaning period commencing  
131 immediately after their mothers stop nursing. This time-window is ideally suited to investigating the influence of  
132 intrinsic factors on gut microbiomes because all northern elephant seal pups remain within their natal colonies  
133 without feeding until they leave the rookery around seven weeks later (Reiter, Stinson, & Boeuf, 1978).  
134 Consequently, variation in gut microbiome beta diversity (microbiome similarity between samples) and alpha  
135 diversity (microbiome diversity within samples) should be largely driven by intrinsic factors such as sex,  
136 developmental stage and health rather than by extrinsic factors such as habitat or dietary changes. We therefore  
137 used repeated, longitudinal sampling of rectal swabs to characterise the early-life gut microbiome of the northern  
138 elephant seal and to explore the factors driving variation in beta and alpha diversity, with a particular emphasis on  
139 sex-differences, which may reflect early life-history adaptations. Lastly, we used microsatellite genotyping to test  
140 the hypothesis that genetically more related individuals also host more similar gut microbiomes. Overall, our study  
141 provides a rare glimpse into the early development of the gut microbiome in a natural population within a diet-  
142 controlled setting that allowed us to evaluate intrinsic sources of microbial variation in the wild.

143

## 144 **Materials and Methods**

### 145 **Study design and sample collection**

146 We marked 40 northern elephant seal pups and their mothers during the breeding season in February/March 2017  
147 at Benito del Oeste, the westernmost island of the San Benito Archipelago off the west coast of Baja California,  
148 Mexico. We closely observed mother-offspring pairs in order to determine the weaning dates of each pup.

149 Weaning typically occurs close to 28 days after birth (Reiter et al., 1978) and marks the time that the mother  
150 abandons her pup and returns to the sea. At this moment, we sampled the newly weaned pup (time point T1). To  
151 analyse the gut microbiome composition, we took rectal swabs using FLOQSwabs™, which were immediately  
152 stored in 70% EtOH, frozen at -20°C within a few hours after collection and subsequently stored at -80°C shortly  
153 after the end of the field season. To determine the genetic relatedness of individuals, we collected a small skin  
154 sample (9 mm<sup>2</sup>) from the flipper of each pup and stored these individually in sterile cryogenic vials containing  
155 70% EtOH. The vials were frozen at -20°C within a few hours after collection and were subsequently stored at -  
156 80°C. During the T1 sampling period, we collected rectal swabs and skin samples from 40 pups, which were  
157 marked with plastic flipper tags with a unique ID number. Subsequently, we observed these pups on a daily basis  
158 and captured them after 15 days (T2) and 30 days (T3) to collect two additional rectal swabs for microbial profiling.  
159 The entire sampling scheme spanned the two-month long fasting period during which the weaned pups stay ashore  
160 (Reiter et al., 1978). We sampled blood from each individual to assess its health status at T1 and T3. Briefly, blood  
161 was collected from the extradural intervertebral vein, using a vacuum blood collection device with a 18 G needle.  
162 Blood samples were preserved with EDTA and were used to determine the total and differential leukocyte counts  
163 as has been described previously (Flores-Morán et al., 2017). Throughout the field season, we lost six of the  
164 marked pups, as one died between T1 and T2, one between T2 and T3, one was not found after T1 and three pups  
165 were lost after T2, despite intensive searching effort. Thus, sample sizes were 40 pups at T1, 38 at T2, and 34 at  
166 T3. All sampling was conducted with the approval of the Bioethics Committee and IACUC of the Autonomous  
167 University of Queretaro, and all capture and sampling procedures were carried out under permit DGVS 00091 /17  
168 issued by the Mexican Secretariat of the Environment and Natural Resources.

169

#### 170 **Host DNA extraction and microsatellite genotyping**

171 Total genomic DNA was extracted from skin samples using a standard chloroform extraction protocol and  
172 genotyped at 21 previously developed microsatellite loci (see Supplementary Information for details). We tested  
173 all of the microsatellite loci for deviations from Hardy-Weinberg equilibrium (HWE) using exact tests based on  
174 Monte Carlo simulations implemented in pegas (Paradis, 2010) and applied a false discovery rate correction  
175 (Benjamini & Hochberg, 1995) to the resulting *p*-values. All 21 loci were retained in the final dataset as no locus  
176 was out of HWE.

177

178 **Bacterial DNA extraction, library preparation and sequencing**

179 We extracted DNA from 112 rectal swabs using the QIAamp PowerFecal DNA Kit (Qiagen), and amplified a 300  
180 bp of the V3 and V4 regions of the 16S rRNA gene. The amplicon libraries were prepared as follows: 1-10 ng of  
181 DNA extract (total volume 1µl), 15 pmol of each forward primer 341F 5'-  
182 NNNNNNNNNNTCCTACGGGNGGCWGCAG and reverse primer 785R 5'-  
183 NNNNNNNNNNTGACTACHVGGGTATCTAAKCC in 20 µL volume of 1 x MyTaq buffer containing 1.5 units  
184 MyTaq DNA polymerase (Bioline) and 2 µl of BioStabII PCR Enhancer (Sigma). For each sample, the forward  
185 and reverse primers had the same 10-nt barcode sequence. PCRs were carried out for 30 cycles of 1 min 96°C pre-  
186 denaturation; 96°C for 15 s, 50°C for 30 s, 70°C for 90 s. The DNA concentration of the amplicons of interest was  
187 determined by gel electrophoresis. About 20 ng of amplicon DNA of each sample was pooled for up to 48 samples  
188 carrying different barcodes. The amplicon pools were purified with one volume of AMPure XP beads (Agencourt)  
189 to remove primer dimer and other small miss-priming products, followed by an additional purification on  
190 MiniElute columns (Qiagen). About 100 ng of each purified amplicon pool DNA was used to construct Illumina  
191 libraries using the Ovation Rapid DR Multiplex System 1-96 (NuGEN). Illumina libraries were pooled and size  
192 selected by preparative gel electrophoresis. Sequencing was performed on an Illumina MiSeq platform using V3  
193 Chemistry – 2x300 bp read length (Illumina). DNA extraction, library preparation and sequencing were carried  
194 out by LGC Genomics in Berlin.

195

196 **Bioinformatics pipeline**

197 The 16S sequences in FASTQ format were demultiplexed using the Illumina bcl2fastq 2.16.1.14 software while  
198 allowing up to 2 mismatches or Ns in the barcode. Reads were sorted according to their barcodes, allowing up to  
199 1 mismatch per barcode before removing the barcodes. Reads with missing, one-sided or conflicting barcode pairs  
200 were discarded. Adapters were clipped using cutadapt 1.13 (Martin, 2011) and all reads smaller than 100 bp were  
201 filtered out. Amplicon primers were detected while allowing for up to three mismatches, and primer pairs  
202 (Forward-Reverse or Reverse-Forward) had to be present in the sequence fragments. If primer dimers were  
203 detected, the outer primer copies were clipped from the sequence and the sequence fragments were turned into  
204 forward-reverse primer orientation after removing the primer sequence.

205

206 We used DADA2 1.8 (Benjamin J. Callahan et al., 2016) for further filtering and processing the sequences into  
207 Amplicon sequence variants (ASVs), following the authors' published workflow (Ben J. Callahan, Sankaran,  
208 Fukuyama, McMurdie, & Holmes, 2016). Unlike the traditional grouping into operational taxonomic units  
209 (OTUs), ASVs are exact sequence variants and have the compelling advantages of higher taxonomic resolution as  
210 well as reproducibility and reusability across studies (Benjamin J. Callahan, McMurdie, & Holmes, 2017). After  
211 visually inspecting the quality profiles of all reads, we used DADA2's filterAndTrim function to trim R1 and R2  
212 sequences to 220 and 230 base pairs respectively and to filter all reads with more than two expected errors (Edgar  
213 & Flyvbjerg, 2015). As DADA2 relies on a parametric error model, we used the learnErrors function to evaluate  
214 error rates from the data and visually confirmed that the resulting error rate estimates provided a good fit to the  
215 observed rates using plotErrors (Ben J. Callahan et al., 2016). After dereplication with derepFastq, we used the  
216 dada function for correcting substitution and indel errors as well as for sample inference based on the pooled  
217 samples. Subsequently, we merged forward and reverse reads with a minimum overlap of 12 bp using mergePairs  
218 and constructed a sequence table with makeSequenceTable. After inspecting the distribution of sequence lengths  
219 across samples and considering a median full amplicon size of around 460 bp prior to primer clipping (Klindworth  
220 et al., 2013), primer-clipped sequences of lengths between 380 and 450 bp were retained. As a last filtering step,  
221 we removed chimeras with removeBimeraDenovo using the consensus method. We assigned taxa to the ASVs  
222 using the assignTaxonomy and addSpecies functions based on the SILVA database v128 (Quast et al., 2012). The  
223 resulting ASV table contained 2809 ASVs in 112 samples.

224

### 225 **Clinical assessment of health**

226 For each blood smear, we quantified the differential white blood cell populations by counting the number of  
227 lymphocytes, neutrophils, band neutrophils, hypersegmented neutrophils, monocytes, basophils, and eosinophils,  
228 in 100 leukocytes. Absolute numbers for each leucocyte type were calculated by multiplying the total white blood  
229 cell count, previously determined by the use of a Neubauer chamber, by the proportion of each leucocyte type.  
230 Based on the clinical reference values previously reported for clinically healthy northern elephant seal pups  
231 (Bossart, Reidarson, Dierauf, & Duffield, 2001; Yochem, Stewart, Mazet, & Boyce, 2008) we classified the  
232 clinical health status of each pup as either healthy (i.e. none of the leukocyte types deviated from the normal  
233 ranges) or not-healthy (i.e. at least one cell type was out of the normal range).

234



235 **Data processing and analyses**

236 **Microbial data**

237 All subsequent analyses were conducted in R version 3.4.3 (R Core Team). As a first filtering step after taxonomic  
238 assignment, we discarded ASVs classified as mitochondria ( $n = 3$ ) or chloroplasts ( $n = 8$ ) together with ASVs that  
239 could not be identified at the Class level ( $n = 77$ ), as these are more likely to contain sequencing errors. Based on  
240 a visual assessment of ASV abundance and prevalence (Supplementary Figure 5), we then removed ASVs that did  
241 not appear in at least three samples ( $n = 982$ ) or which had a total read count below 30 across all samples ( $n =$   
242 683).

243 Overall, 1063 ASVs were retained across all 112 samples in the filtered dataset. Before analysing microbiome  
244 similarities across groups, we applied the variance stabilising transformation (VST) in DESeq2 (Love, Huber, &  
245 Anders, 2014), which uses a negative binomial mixed model to account for differences in library size across  
246 samples and to disentangle the relationship between the variance and the mean inherent to count data. Compared  
247 to other normalisation and transformation methods traditionally applied to microbiome data, the VST has the  
248 advantage of using all of the available data and is therefore preferable both to rarefying approaches (McMurdie &  
249 Holmes, 2014) and to transforming the data into relative abundances, which still has the problem of  
250 heteroscedasticity (Love et al., 2014). Based on the VS transformed data, we calculated Bray-Curtis dissimilarities  
251 (Bray & Curtis, 1957) among samples to visualise group differences using principle coordinate analysis (PCoA).  
252 We then statistically evaluated the microbiome composition in relation to sex, time point, host ID and health status  
253 using permutational multivariate analyses of variance (PERMANOVA, Anderson, 2001) with 1000 permutations  
254 using the adonis function in vegan (Oksanen et al., 2017). This approach is analogous to a parametric analysis of  
255 variance as that it partitions distance matrices into sources of variation and produces a pseudo-F value, the  
256 significance of which can be determined using a permutation test. As group differences detected using a  
257 PERMANOVA can be caused by variation in dispersion across groups rather than differences in mean values  
258 (Anderson, 2001), we tested for homogeneity of group dispersions using betadisper in vegan (Anderson, 2001;  
259 Oksanen et al., 2017) with *post-hoc* comparisons between specific contrasts evaluated with Tukey's 'honest  
260 significant differences' method.

261

262 A main interest in microbial research is to determine the specific bacterial taxa that differ among groups. We  
263 therefore used the filtered but untransformed ASV data in combination with the DESeq2 method to determine

264 differential abundances (Love et al., 2014). DESeq2 models abundance data such as microbial counts using a  
265 negative binomial distribution, estimates log fold changes between groups based on the specified model, and  
266 corrects the resulting  $p$ -values with a Benjamini and Hochberg false-discovery rate correction (Benjamini &  
267 Hochberg, 1995). As our ASV count matrix contained at least one zero in every row, we calculated the underlying  
268 size factors using the ‘poscounts’ estimator, which excludes zeros when calculating the geometric mean. To extract  
269 the appropriate group-specific contrasts, we fitted three different models and used a threshold of  $p < 0.01$  to detect  
270 significant ASVs. Specifically, for analysing differential abundances between time points but within a given sex,  
271 the first two models contained ASV data for just females and just males respectively, while fitting both individual  
272 and time point in the model. To analyse and extract between-sex contrasts within each sampling time point, we  
273 constructed a third model by creating a new grouping factor as a combination of time point and sex, which was  
274 then fitted as predictor variable in the model.

275

276 To quantify which factors influence alpha diversity, we calculated Shannon indices based on the unfiltered and  
277 untransformed ASVs (2809 ASVs across 112 samples) to not bias the estimates by trimming rare ASVs, as  
278 suggested in the phyloseq tutorial (McMurdie & Holmes, 2013). Then we fitted a first Gaussian mixed model in  
279 lme4 (Bates, Mächler, Bolker, & Walker, 2014) with Shannon diversity as response, sex and time point as fixed  
280 effects and host ID as random effect. As we could only assess the health of the individuals at time point T1 and  
281 T3, during which we sampled blood, we fitted a second Gaussian mixed model including data from only these two  
282 time points with Shannon diversity as response, health status (healthy vs. not healthy), sex and time point as fixed  
283 effects and individual as random effect. We calculated the  $R^2$  based on (Nakagawa & Schielzeth, 2013) and 95%  
284 confidence intervals around the  $R^2$  and the model estimates using parametric bootstrapping with 1000 replications.  
285 The individual adjusted repeatability including 95% CI was estimated with rptR (Stoffel, Nakagawa, & Schielzeth,  
286 2017) using the same model structure and 1000 bootstraps.

287

### 288 **Genetic relatedness and microbial similarity**

289 We estimated pairwise genetic relatedness based on 21 microsatellite loci using the R package Demerelate  
290 (Kraemer & Gerlach, 2013). We used the Loiselle estimator (Loiselle, Sork, Nason, & Graham, 1995) which is  
291 unbiased for small sample sizes and converged towards stable values for the number of loci used in this study  
292 (Supplementary Figure 6). To match the microbial data to the pairwise genetic relatedness matrix containing 40

293 individuals for further analyses, we merged the microbial data across the three time points for every individual by  
294 summing up the ASV abundances. The 40 merged microbiome samples were then transformed using the variance-  
295 stabilising transformation in DESeq2 before calculating Bray-Curtis dissimilarities. Both the genetic relatedness  
296 matrix and the microbial dissimilarity matrix were then split by sex to calculate their correlation using a Mantel  
297 test implemented in the ecodist package (Goslee & Urban, 2007) using 10,000 bootstraps with the default  
298 resampling level of 0.9 to calculate confidence intervals and 10,000 permutations to test for statistical significance.  
299 We furthermore wanted to test for a difference in slopes between males and females, which is not possible using  
300 Mantel tests. Consequently, we fitted a simple linear model of microbiome similarity that included an interaction  
301 term between relatedness and sex. In this model, we essentially treated pairwise comparisons as data points, which  
302 makes the normal  $p$ -value meaningless due to pseudo-replication in the data. We therefore estimated the interaction  
303 slope and its confidence interval using parametric bootstrapping, and determined the corresponding  $p$ -value by  
304 randomly permuting the relatedness vector and re-fitting the model. This resulted in a distribution of interaction  
305 estimates and yielded the probability of seeing an effect as strong or stronger than the observed effect by chance.

306

307 We investigated the proportion of gut microbiota that are impacted by host genetics using a subsampling exercise.  
308 We began by calculating microbial similarities from the two most abundant ASVs and determining the strength of  
309 correlation of the resulting microbial similarity matrix with genetic relatedness. We then iteratively repeated this  
310 procedure while always adding the next two most abundant ASVs until we reached the complete dataset containing  
311 1064 ASVs. Lastly, we wanted to know whether the correlation between genetic relatedness and microbial  
312 similarity changed across the three time points and if it differed between sexes. We therefore used the original  
313 unmerged dataset and subsetted both the microbial and genetic datasets six times to calculate and visualize the  
314 correlation for all three time points and both sexes.

315

## 316 **Results**

317 To investigate the development of the gut microbiome in young northern elephant seals, we collected rectal swab  
318 samples from 40 animals during three time points after weaning. We started sampling immediately after their  
319 mothers stopped nursing and returned to the sea (time point T1) and then resampled each individual after two (T2)  
320 and four weeks (T3). The individuals were on average 28, 43 and 58 days old at time points T1, T2 and T3  
321 respectively. As a few animals were lost or found dead during the study period (see Materials and methods for

322 details), our final sample comprised a total of 112 rectal swabs across three time points for which we quantified  
323 bacterial communities using 16S rRNA sequencing. After assembling the raw reads into amplicon sequence  
324 variants (ASVs), we retained 1063 ASVs with an average of  $286 \pm 67$  ASVs (mean  $\pm$  sd) per sample.

325

### 326 **Characterization of the gut microbiome**

327 Overall, the main bacterial phyla that we identified were typical of a mammalian gut microbiome (Figure 1), with  
328 the majority of ASVs belonging to the phyla Bacteroidetes (mean  $\pm$  sd =  $34\% \pm 2\%$ ), Firmicutes (mean  $\pm$  sd =  
329  $29\% \pm 1\%$ ), Fusobacteria (mean  $\pm$  sd =  $19\% \pm 3\%$ ), and Proteobacteria (mean  $\pm$  sd =  $13\% \pm 1\%$ ). The relative  
330 abundances of these four phyla remained relatively stable over time, except for the Fusobacteria, which decreased  
331 steadily during weaning (Figure 1). However, at a finer taxonomic scale, we observed substantial changes across  
332 the three time points (see below).

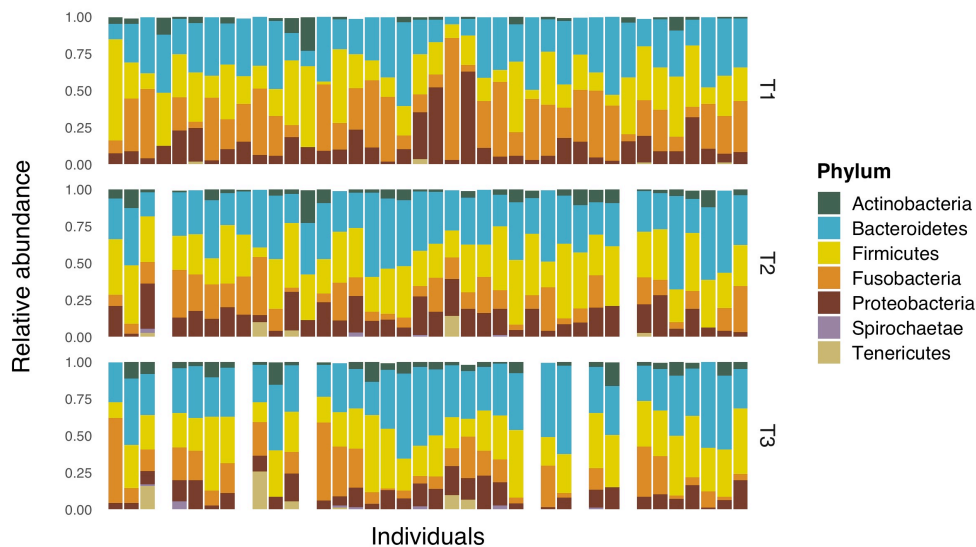

333

334 **Figure 1: Relative abundance of bacterial phyla in gut samples from 40 northern elephant seals across three**  
335 **time points.** The sampling time points T1, T2 and T3 correspond to individuals at 28, 43 and 58 days of age,  
336 respectively. Rare phyla with relative abundances below 1% are not shown. White columns represent individuals  
337 that either died or were lost during the course of the study.

338

### 339 **The core microbiome across individuals at different ages**

340 We characterised the core microbiome at different developmental stages during the weaning period by extracting  
341 ASVs that appeared in at least 95% of samples at each time point (Supplementary Tables 1–3). Directly after  
342 weaning (T1), we identified 21 core ASVs, with two ASVs from the genera *Fusobacterium* and *Bacteroides*  
343 making up more than 25% of the average microbiome across individuals. This pattern changed substantially at T2

344 and T3. Here, we identified 15 and 35 core ASVs respectively, but the dominance of the two ASVs from T1  
345 disappeared. Instead, a taxon from the genus *Ezakiella*, which only emerged after T1, became the most dominant  
346 ASV during T2 and T3 (with an average of 4% relative abundance). This is a recently discovered genus, of which  
347 only two species have been described; one from fecal samples of a coastal human indigenous Peruvian population  
348 (Patel et al., 2015) and one from the human female genital tract (Diop, Raoult, Bretelle, & Fenollar, 2017). Closer  
349 to the time of nutritional independence (T3), a taxon from the genus *Prevotella* became the most successful new  
350 colonizer and the second most abundant genus. Concurrently, an ASV from the genus *Bacteroides*, which initially  
351 was the second most abundant taxon, decreased substantially in relative abundance (Supplementary Table 3,  
352 Supplementary Figure 4).

353

354

### 355 **Sex, age, host ID and health effects on gut microbiome beta diversity.**

356 To explore the major determinants of gut microbiome similarity across samples (beta diversity), we used a  
357 multidimensional scaling plot (MDS) of Bray-Curtis similarities between bacterial samples for visualisation and  
358 PERMANOVA (Anderson, 2001) for statistical analysis. Figure 2A shows variation due to sex and sampling time  
359 point (i.e. the age of individuals). Along the first axis, which accounts for 28.5% of the multidimensional spread  
360 in the data, a visible transition is apparent from the moment of weaning (T1) to the last sampling point (T3), shortly  
361 before the seals depart to the sea for feeding on their own, with samples from T2 being intermediate. A strong  
362 separation is also visible along axis 2, which accounts for 13.4% of the variation and reveals substantial differences  
363 in gut microbiome composition between the two sexes across the three sampling time points. Furthermore,  
364 microbiome samples from the same host cluster together, showing intra-individual consistency of gut microbial  
365 communities across the weaning-period (Figure 2B). Lastly, Figure 2C shows no or very little visible clustering  
366 of gut microbiome samples within healthy and non-healthy individuals, respectively.

367

368 To statistically analyse microbial group differences we fitted two PERMANOVA models which partition the  
369 microbial similarity matrix into variance components. The first model included sampling time point, sex and host  
370 ID as predictors of microbial similarity and included samples across all three time points. Overall, time point and  
371 sex each explain around 15% of the variation in microbial similarities (age:  $R^2 = 0.15$ ,  $p < 0.001$ , sex:  $R^2 = 0.15$ ,  
372  $p < 0.001$ ), while microbiome samples from the same host are also more similar, with host ID explaining 40% of

373 the variation ( $R^2 = 0.40, p < 0.001$ ). After fitting the model with all of the samples, we analysed sex-differences  
374 within each time point *post-hoc* to avoid potential effects of repeated measures and to shed light on sex-specific  
375 patterns over time. The difference in gut microbiome between composition between males and females is already  
376 substantial at the time of weaning (T1:  $R^2 = 0.13, p < 0.001$ ), and further increases in the following weeks (T2:  $R^2$   
377  $= 0.26, p < 0.001$ , T3:  $R^2 = 0.21, p < 0.001$ ). Lastly, we compared specific time points *post-hoc*, while still fitting  
378 sex and host ID in the model. The transition from T1 to T2 explains 10.3% of the variation ( $R^2 = 0.10, p < 0.001$ )  
379 while 4.1% is explained by microbial differences between T2 and T3 ( $R^2 = 0.04, p < 0.001$ ).

380 The second model included health status, sampling time point, sex and host ID as predictors of microbial similarity  
381 but was based only on samples from time points T1 and T3, during which we took blood samples to assess the  
382 health status of the individuals. Half of the pups sampled at T1 were clinically healthy, while most of the remaining  
383 pups had neutropenia (low levels of neutrophils) and lymphocytosis (high levels of lymphocytes), and 5% showed  
384 the opposite pattern, exhibiting neutrophilia and mild monocytosis. At T2, 39% of the pups had neutropenia and  
385 lymphocytosis, and only one pup had neutrophilia and mild monocytosis. Overall, health status only explained a  
386 negligible part of the overall variation in beta diversity ( $R^2 = 0.025, p = 0.004$ ). Consistent with the results from  
387 the first model, sex, time point and host ID each had large effects (age:  $R^2 = 0.21, p < 0.001$ , sex:  $R^2 = 0.11, p <$   
388  $0.001$ , host ID:  $R^2 = 0.44, p < 0.001$ ). When comparing healthy and non-healthy individuals within each time point,  
389 the differences are slightly stronger at T1 ( $R^2 = 0.06, p = 0.008$ ) compared to T3 ( $R^2 = 0.04, p = 0.116$ ). The  
390 PERMANOVA assumption of multivariate homogeneity of group variances was met across all tests, as none of  
391 the contrasted groups differed in their dispersions (all  $p > 0.05$ ). Consequently, all PERMANOVA results reflect  
392 differences in mean values across groups rather than differences in group dispersions (Anderson, 2001).

393

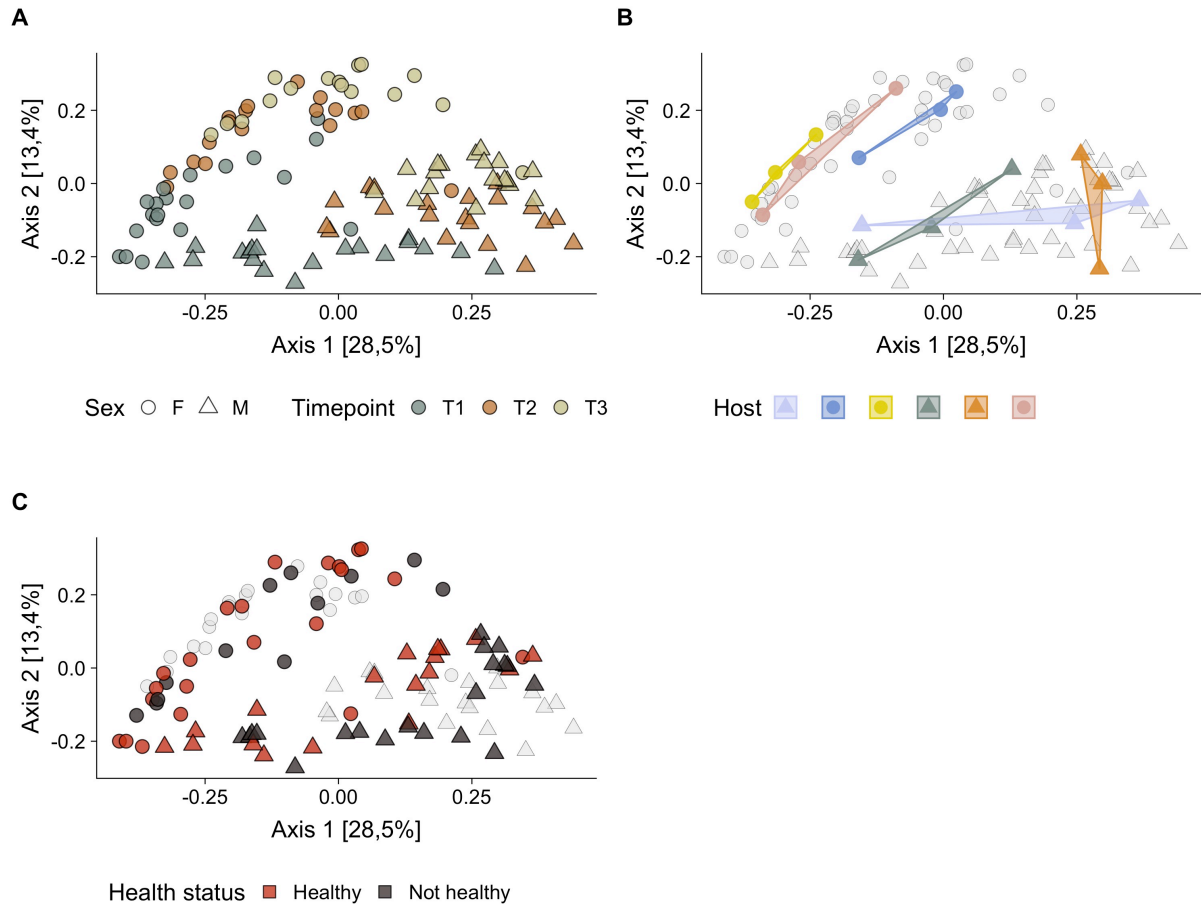

394

395 **Figure 2: Gut microbiome sample beta diversity by (A) sex and sampling time point; (B) host ID and (C)**  
396 **health status.** Shown are three different versions of the same multidimensional scaling (MDS) plot based on the  
397 Bray-Curtis similarities between 113 northern elephant seal gut microbiome samples, in which different color  
398 schemes are applied to emphasize different variables influencing beta diversity. All plots show samples obtained  
399 from males and females as rectangles and circles, respectively. Plot A is additionally colour coded according to  
400 sampling time point, plot B shows a selection of samples colour coded according to host identity (six samples were  
401 selected to avoid over-plotting while visualizing the similarity of microbiome samples obtained from the same  
402 host) and plot C shows colours according to the health status of the individuals. Health status could only be  
403 determined for samples at time point T1 and T3, when blood samples were taken. In all plots, females are denoted  
404 by circles and males by triangles. Data from all the samples were normalized using the variance stabilizing  
405 normalization implemented in DeSeq2 and the axes were length-scaled to reflect the Eigenvalues of the underlying  
406 principle coordinates.

407

408 **Differential abundance of specific taxa across time and between sexes**

409 At a finer scale, we used boxplots and raw data to visualize trends across time and sex for different hierarchical  
410 taxonomic ranks, from phylum to order. Supplementary Figures 1–3 reveal the complexity of the underlying

411 dynamics, including multiple colonization and extinction events and often contrasting patterns at different  
412 taxonomic level. To quantify differences at the highest possible resolution, we tested for differentially abundant  
413 ASVs across time points and sexes using the DESeq2 method (Love et al., 2014). We provide a detailed description  
414 of all differential abundances in the Supplementary Material 2. Overall, the majority of significant changes in  
415 microbial abundances for both females and males happened between T1 and T2 (F:  $n = 100$ , M:  $n = 106$ ) with less  
416 than half as many ASVs changing in abundance from T2 to T3 (F:  $n = 43$ , M:  $n = 26$ ). Most of the ASVs that  
417 changed over time belonged to the *Clostridia* and *Bacteroidia* in both sexes (see Supplementary Figure 8). The  
418 number of differentially abundant ASVs between males and females was similarly large at all time points (T1:  $n$   
419 = 96, T2:  $n = 102$ , T3:  $n = 80$ , see Supplementary Figure 9), and more than a third belonged to the *Clostridia*  
420 *Family XI* and the family *Ruminococcaceae*. However, while the overall number of differentially abundant ASVs  
421 between the sexes remained fairly similar throughout weaning, their taxonomic diversity appeared to increase  
422 (Supplementary Figure 9).

423

#### 424 **Sex, age, host ID and health effects on gut microbiome alpha diversity.**

425 Microbial alpha diversity is frequently quantified in microbiome studies and is usually found to change during the  
426 development of vertebrates (Clark et al., 2015; O'Toole & Jeffery, 2015; Videvall et al., 2019). As a measure of  
427 alpha diversity, we used the Shannon index, which takes both species richness and the relative abundances of  
428 different species into account. To investigate the factors impacting microbial diversity across all three time points,  
429 we constructed a Gaussian mixed model of Shannon diversity with sex and sampling time point fitted as fixed  
430 effects and host ID as a random effect. The model only explained a small proportion of the variation in diversity  
431 ( $R^2 = 0.06$ , 95% CI [0.01, 0.18]) but revealed a higher diversity for males than for females ( $\beta = 0.20$ , 95% CI  
432 [0.03, 0.39]). Moreover, Shannon diversity was stable across the post-weaning period and did not change between  
433 any two time points (T2 vs. T1: ( $\beta = 0.12$ , 95% CI [-0.10, 0.34]), T3 vs. T1: ( $\beta = 0.12$ , 95% CI [-0.07, 0.34])). These  
434 patterns are shown as boxplots alongside the raw data points in Figure 3. Contrary to microbial composition (beta  
435 diversity), where samples from the same host were more similar over time than between hosts, the alpha diversity  
436 of samples from the same individuals was not repeatable across time points ( $r = 0.1$ , 95% CI [0.00, 0.3]).

437 We then modelled the association between microbiome diversity and health status of individuals using a mixed  
438 model that only included data from the two time points in which we sampled blood and assessed the health of  
439 individuals. We fitted sex, health status and time point as fixed effects and host ID as a random effect. Healthy



440 individuals hosted more diverse microbiomes than non-healthy individuals ( $\beta = 0.32$ , 95% CI [0.08, 0.55]), males  
441 had a slightly higher diversity than females ( $\beta = 0.15$ , 95% CI [-0.10, 0.40]) and the diversity was slightly higher  
442 at T3 than at T1 ( $\beta = 0.18$ , 95% CI [-0.04, 0.41]). Notably, this analysis suggests that the difference in diversity  
443 between males and females can be partially explained by a difference in the average health status of the two sexes,  
444 with the proportion of healthy individuals being higher in males (T1: F = 37%, M = 60%, T3: F = 33%, M = 44  
445 %). Overall, this model explained slightly more variation in alpha diversity ( $R^2 = 0.14$ , 95% CI [0.05, 0.36])  
446

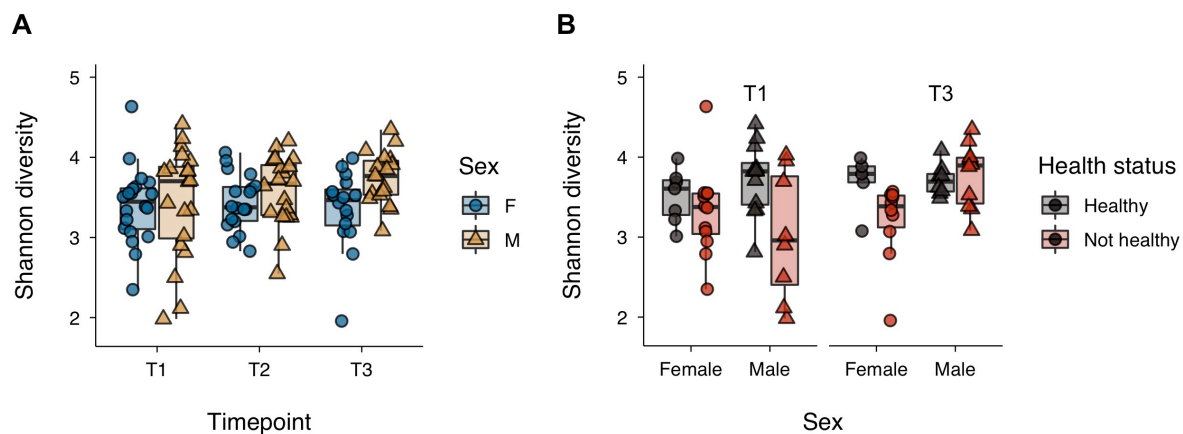

447  
448 **Figure 3: Sex-specific microbial alpha diversity (A) over time and (B) for healthy and non-healthy**  
449 **individuals within time points T1 and T3.** Shown is the Shannon diversity of untransformed and unfiltered reads  
450 with circles and triangles representing samples from females and males, respectively. The boxplots are showing  
451 the intermediate 50% of data in the box and extending their whiskers to the data at maximally 1.5 times the  
452 interquartile range.

#### 453 454 **Association between genetic relatedness and beta diversity**

455 A fundamental topic in microbial ecology is the importance of host genotype for the formation of the gut  
456 microbiome. We approached this question by quantifying the correlation between host genetic relatedness and  
457 microbial similarity (Figure 4). Mantel tests showed a significant association in males ( $r = 0.26$ , CI [0.17, 0.34],  $p$   
458 = 0.0013), which was visible across all three time points (Supplementary Figure 1). By contrast, we found no  
459 relationship in females, either overall ( $r = 0.06$ , CI [0.00, 0.12],  $p = 0.41$ ) or within each time point (Supplementary  
460 Figure 4). As a difference in significance is not always a significant difference, we fitted a linear model to test for  
461 differences between the sex-specific slopes by fitting an interaction between relatedness and sex, with microbial  
462 dissimilarity as the response. The interaction term estimate was also negative ( $\beta = -0.11$ , CI [-0.23, -0.006],  $p =$

463 0.02), indicating that microbial dissimilarity is more negatively correlated with genetic relatedness in males than  
464 in females.

465

466 To further investigate the effect of host relatedness on microbial similarity, we evaluated how many bacterial taxa  
467 are influenced by host genetics. We calculated the mantel correlation between genetic relatedness and microbial  
468 similarity based on an increasing number of ASVs, starting with the two most abundant (relative abundance) and  
469 iteratively increasing the number by the next two most abundant ASVs until we reached the full dataset (Figure  
470 5). For females, the pattern across all subsets reflected the results from the full dataset and did not show a  
471 significant association between genetic relatedness and bacterial similarity. For males, a small number of ASVs  
472 contributed strongly to the overall correlation, but a peak in Mantel's  $r$  was not reached until the 300 most abundant  
473 ASVs were included in the analysis. This suggests that a large proportion of taxa are at least slightly impacted by  
474 the host genotype as they contribute iteratively to an increasingly strong correlation.

475

476

477

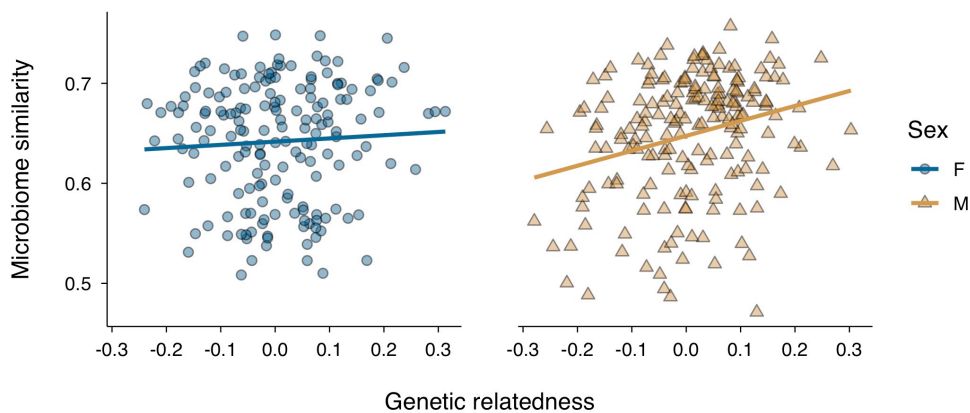

478

479 **Figure 4: Relationship between pairwise gut microbiome similarity and genetic relatedness.** For every  
480 individual, the microbiome data across all time points were merged by summing up ASV abundances. The  
481 abundance data were subsequently transformed using the variance-stabilising transformation in DESeq2 before  
482 calculating Bray-Curtis similarities between individuals. Genetic relatedness was estimated based on 21  
483 microsatellite markers using the Loiselle estimator, with higher values representing elevated genetic relatedness.

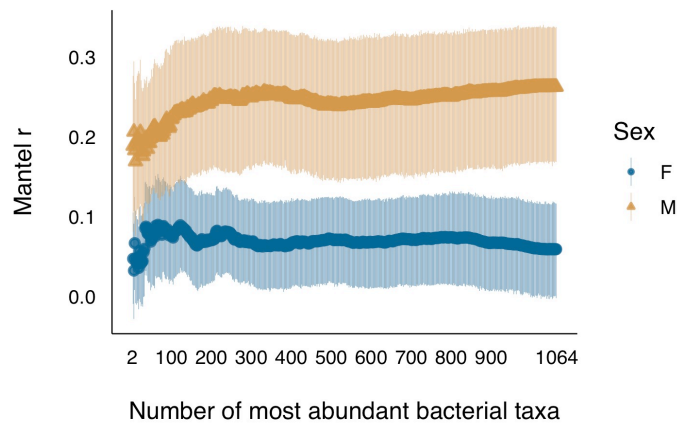

484

485 **Figure 5: Strength of correlation between gut microbial similarity and genetic relatedness for an increasing**  
486 **number of microbial taxa.** Each data point shows the correlation between microbial Bray-Curtis similarity and  
487 genetic relatedness with 95% confidence intervals calculated by non-parametric bootstrapping of samples. Bray-  
488 Curtis similarities were calculated based on an increasing number of ASVs, starting with the two ASVs yielding  
489 the highest relative abundances across all samples and iteratively increasing the number by the next two most  
490 abundant ASVs until the full dataset of 1064 ASVs was reached.

491

## 492 Discussion

493 Microbiome studies of wild populations are essential for gaining an understanding of the ecological and  
494 evolutionary role of animal-microbe relationships (Hird, 2017). However, intrinsic effects on the gut microbiome  
495 such as sex differences are difficult to study, partly because they might be small in the first place, but also because  
496 environmental factors such as diet (David et al., 2014) may overshadow biological effects. Here, we studied an  
497 animal with extreme sexual dimorphism and sex-specific life-history strategies, where we would expect intra-  
498 species microbial variation to be large. Moreover, by sampling northern elephant seal weaners, which share the  
499 same dietary history and which did not feed during the sampling period, our sampling design minimized microbial  
500 variation due to diet, making it possible to provide a baseline assessment of the developing gut microbiome and  
501 shed light on individual-specific factors impacting it, in particular sex, age, health status and genotype.

502

503 First of all, we showed that the northern elephant seal gut microbiome at the time of weaning is already relatively  
504 complex with an average of nearly 300 ASVs per individual from 14 different phyla. Four of these phyla are highly  
505 abundant, the *Bacteroidetes*, *Firmicutes*, *Fusobacteria*, and *Proteobacteria*, and have previously been shown to  
506 be the main phyla in most pinniped guts (Bik et al., 2016; Glad et al., 2010; Nelson, Rogers, & Brown, 2013;  
507 Numberger, Herlemann, Jürgens, Dehnhardt, & Schulz-Vogt, 2016). However, their relative contribution varies

508 across studies, partly due to differences across species, but also probably due to differences in sampling methods  
509 as well as environmental effects.

510

511 Patterns of early gut microbiome development are in general difficult to compare across mammals due to the small  
512 number of studies that have conducted longitudinal sampling during early life. One mammal in which the gut  
513 microbiome has been studied before and after weaning is the domestic pig, which shares some similarities to the  
514 patterns we report here. First of all, the most abundant bacterial phyla in weaned pigs, as in this study, were  
515 *Firmicutes* and *Bacteroidetes* (Pajarillo, Chae, Balolong, Kim, & Kang, 2014). Second, the dietary transition from  
516 nursing to weaning was found to be reflected in a marked decrease in the genus *Bacteroides* combined with an  
517 increase in *Prevotella* (Frese et al., 2015; Pajarillo et al., 2014), which we similarly observed in elephant seals.  
518 Although the specific functions of these genera are still under debate (Gorvitovskaia, Holmes, & Huse, 2016),  
519 *Bacteroides* have been shown to break down milk oligosaccharides and may therefore be important during nursing  
520 (A. Marcobal & Sonnenburg, 2012; Angela Marcobal et al., 2011), while *Prevotella* are associated with plant  
521 polysaccharide consumption and might therefore be important for the digestion of solid food (Ivarsson, Roos, Liu,  
522 & Lindberg, 2014). Interestingly, although increases in *Prevotella* have previously been associated with the  
523 transition to a solid diet (Frese et al., 2015), elephant seal weaners show an increase in *Prevotella* after weaning  
524 despite the fact that they are fasting. One possible explanation for this pattern could be a role of *Prevotella* for  
525 modulating immune tolerance instead of a diet-related function, which has previously been found in humans  
526 (Larsen, 2017).

527

528 Despite these changes in the composition of gut microbial communities, which include abundance changes as well  
529 as colonisation and extinction events, the average alpha diversity of elephant seal gut microbiomes was relatively  
530 stable throughout our study. This is surprising, as alpha diversity is usually quite dynamic across both shorter and  
531 longer time scales (Ballou et al., 2016; Frese et al., 2015; Kundu et al., 2017; Videvall et al., 2019). Consequently,  
532 the stability of gut microbial diversity observed in this study might be a consequence of the animals fasting during  
533 the study period, as dietary changes can be a major source of new microbial diversity (Pantoja-Feliciano et al.,  
534 2013).

535

536 In order to improve our understanding of host-microbe interactions in ecology and evolution, environmental  
537 sources of microbial variation need to be disentangled from individual-specific sources of variation. Sex is an  
538 important source of intraspecific differences, and hence a likely source of gut microbial variation. However, sex  
539 differences in the gut microbiome have mostly been found to be negligible or non-existent in wild populations so  
540 far (Bennett et al., 2016; Bobbie et al., 2017; Maurice et al., 2015; Ren et al., 2017; Tung et al., 2015). Although  
541 sex-differences may truly be small in some species, it is also possible that the effects of external factors such as  
542 diet or environment on gut microbial communities mask the effects of sex. In contrast to most of the literature, we  
543 found sex to be a strong and early determinant of gut microbiome composition, but not diversity, in elephant seals.  
544 In fact, sexual dimorphism in the gut microbiome composition precedes any morphological dimorphism, making  
545 it a precursor to what later becomes an extreme morphological and behavioural sexual dimorphism in adult  
546 elephant seals.

547  
548 We found that apparent sex-differences in the gut microbiome alpha diversity (but not beta diversity) were largely  
549 explained by a higher proportion of healthy pups in males than in females. Animals that were categorized as  
550 healthy on the basis of their blood parameters possessed higher gut bacterial diversity than pups categorized as  
551 non-healthy. Recent evidence suggests that the gut microbiome impacts systemic immune effectors, including the  
552 development and output of circulating leukocytes (Grainger, Daw, & Wemyss, 2018) and other studies have shown  
553 that microbiome composition can reflect specific clinical conditions (Kozik, Nakatsu, Chun, & Jones-Hall, 2019;  
554 Pascal et al., 2017). Although none of the northern elephant seal pups we examined had evident signs of illness,  
555 and the observed deviations from normal blood values were mild, it is likely that the pups categorized as ‘non-  
556 healthy’ were suffering from some type of acute transient infection. Further investigation into associations between  
557 the gut microbiome, systemic and local immune effectors, and specific diseases could help to improve our  
558 understanding of links between clinical health and microbiome diversity. However, it is plausible that rather than  
559 signalling a direct relationship between microbiome diversity and health, our results could be a reflection of early  
560 sexual dimorphism in enteric immune tolerance, which would impact the establishment and stability of gut  
561 microbial communities (Duerr & Hornef, 2012; Fulde & Hornef, 2014).

562  
563 A parallel can be drawn between our results and those of a study of southern elephant seals, which also detected  
564 sex specific differences in the gut microbiome (Nelson, Rogers, Carlini, & Brown, 2013). However, this particular

565 study focused on adults, which show extreme sexual size dimorphism as well as marked sex specific differences  
566 in behaviour, diet and foraging behaviour, which would be expected to have strong effects on host associated  
567 microbial communities (Hindell et al., 2016). By contrast, male and female northern elephant seal pups are not  
568 visually distinguishable, and before our first sampling all pups remained close to their mothers to nurse, such that  
569 variation in behaviour, diet and social interactions was negligible. Furthermore, there is evidence for an equal  
570 maternal energy investment in female and male pups during nursing with respect to milk intake (Kretzmann, Costa,  
571 & Le Boeuf, 1993) and offspring mass change (Deutsch, Crocker, Costa, & Le Boeuf, 1994). It is therefore  
572 remarkable that males and females host very different gut microbiomes even directly after weaning, which could  
573 be due to early sex-specific intestinal adaptations and is consistent with earlier findings that diet can have sex-  
574 dependent effects on gut microbial communities (Bolnick et al., 2014). Whether sex-specific gut microbes are  
575 early signs of adaptation related to different adult feeding strategies or other life-history challenges will need to be  
576 examined in future studies.

577

578 A largely unanswered question is how strongly host genetics impacts the composition of the gut microbiome in  
579 wild populations. In humans and mice, genome-wide association studies have shown that at least a small  
580 proportion of the microbiome is genetically determined (Goodrich et al., 2016; Kurilshikov et al., 2017). It has  
581 also been shown that genetically more similar humans harbour more similar gut microbial communities  
582 (Zoetendal, Akkermans, Akkermans-van Vliet, de Visser, & de Vos, 2001), a pattern that seems difficult to  
583 replicate in natural populations (Degnan et al., 2012). In the wild, however, environmental factors such as diet,  
584 habitat or social behaviour are difficult to control for and are likely to mask any smaller, more subtle effects of  
585 host genotype. In this study, we found that genetically related males hosted more similar gut microbiomes.  
586 However, this was not the case in females, which also carry different gut microbiomes than males. This sex-  
587 specific relatedness-microbiome association is visible also within each sampling time point and is robust to the  
588 exclusion of a large number of microbial taxa. However, whether this difference is due to a temporal asymmetry  
589 in microbiome development among females and males or reflects more permanent sex-specific physiological  
590 mechanisms is still unclear.

591

592 **Conclusions**

593 Northern elephant seals exhibit some of the most extreme sex differences among any mammal, both  
594 morphologically and in their life-histories. Here, we studied the gut microbiome and its development in northern  
595 elephant seal pups, from the time when their mothers abandoned them to shortly before they themselves head out  
596 to the open sea. Although morphologically speaking, male and female pups still cannot be distinguished apart  
597 during this period, we could show that the sexual dimorphism in their gut microbiome composition is already  
598 striking, a pattern that to our knowledge has not yet been found in any natural population and which is unlikely to  
599 be attributed to differences in diet. Within a natural, diet-controlled setting, we also showed that gut microbiome  
600 composition is associated with host genetic relatedness in males and changes substantially within only a few weeks  
601 after the end of lactation, potentially anticipating the growing elephant seals' change in diet and life-style.  
602 Furthermore, we showed that health status has little impact on the beta diversity or composition of the microbiome  
603 although the alpha diversity is lower in clinically non-healthy individuals. We conclude that future gut microbiome  
604 studies of wild populations can benefit from species with large inter-individual variation such as northern elephant  
605 seals, and that minimising environmental variation and accounting for potential covariates will be crucial in order  
606 to gain a more in-depth understanding of microbial variation. Overall, our results provide a baseline assessment  
607 of the early colonization and development of elephant seal gut microbes, and contribute towards an improved  
608 understanding of host-microbe interactions in the wild, particularly in the light of sexual dimorphism.

609

## 610 **Acknowledgements**

611 This research was supported by a Deutsche Forschungsgemeinschaft (DFG) standard grant (HO 5122/5-1) to JIH,  
612 and both a dual PhD studentship from Liverpool John Moores University and a DFG postdoctoral fellowship to  
613 MAS. The field work was funded by a Genetics Society Heredity fieldwork grant to MAS and by a grant from  
614 the Autonomous University of Queretaro (Fund for the Advancement of Scientific Research, 142908) awarded to  
615 KAW. The sequencing and laboratory work was also partially funded by the Animal Behaviour Department at  
616 Bielefeld University. We thank the Mexican Secretariat of the Environment and Natural Resources for the research  
617 permit, as well the Biosphere Reserve of the Pacific Islands off the Baja California Peninsula (CONANP, National  
618 Commission for Protected Areas).

619

## 620 **Data and code availability.**

621 The complete documented analysis pipeline and data to reproduce all analyses in the paper can be accessed via  
622 GitHub ([https://github.com/mastoffel/nes\\_microbiome](https://github.com/mastoffel/nes_microbiome)). The raw 16S sequences will be deposited on Dryad upon  
623 publication.

624

625 **Authors' contributions**

626 MAS, KAW and JIH conceived the study. MAS, KAW, NMD and FEV conducted the field work. MAS, SG and  
627 NC analysed the data. NC performed the genotyping. NMD conducted all haematology analyses. MAS, KAW  
628 and JIH wrote the paper and all authors gave feedback and comments.

629

630

631

632 **References**

- 633 Anderson, M. J. (2001). A new method for non-parametric multivariate analysis of variance: Non-parametric  
634 manova for ecology. *Austral Ecology*, 26(1), 32–46. doi: 10.1111/j.1442-9993.2001.01070.pp.x
- 635 Ballou, A. L., Ali, R. A., Mendoza, M. A., Ellis, J. C., Hassan, H. M., Croom, W. J., & Koci, M. D. (2016).  
636 Development of the chick microbiome: how early exposure influences future microbial diversity.  
637 *Frontiers in Veterinary Science*, 3, 2.
- 638 Bates, D., Mächler, M., Bolker, B., & Walker, S. (2014). Fitting linear mixed-effects models using lme4. *ArXiv*  
639 *Preprint ArXiv:1406.5823*.
- 640 Benjamini, Y., & Hochberg, Y. (1995). Controlling the false discovery rate: a practical and powerful approach to  
641 multiple testing. *Journal of the Royal Statistical Society. Series B (Methodological)*, 289–300.
- 642 Bennett, G., Malone, M., Sauther, M. L., Cuzzo, F. P., White, B., Nelson, K. E., ... Amato, K. R. (2016). Host  
643 age, social group, and habitat type influence the gut microbiota of wild ring-tailed lemurs (*Lemur catta*).  
644 *American Journal of Primatology*, 78(8), 883–892.
- 645 Benson, A. K., Kelly, S. A., Legge, R., Ma, F., Low, S. J., Kim, J., ... Hua, K. (2010). Individuality in gut  
646 microbiota composition is a complex polygenic trait shaped by multiple environmental and host genetic  
647 factors. *Proceedings of the National Academy of Sciences*, 107(44), 18933–18938.
- 648 Bik, E. M., Costello, E. K., Switzer, A. D., Callahan, B. J., Holmes, S. P., Wells, R. S., ... Relman, D. A. (2016).  
649 Marine mammals harbor unique microbiotas shaped by and yet distinct from the sea. *Nature*  
650 *Communications*, 7, 10516. doi: 10.1038/ncomms10516
- 651 Bobbie, C. B., Mykytczuk, N., & Schulte-Hostedde, A. I. (2017). Temporal variation of the microbiome is  
652 dependent on body region in a wild mammal (*Tamiasciurus hudsonicus*). *FEMS Microbiology Ecology*,  
653 93(7).
- 654 Boeuf, B. J. L., Crocker, D. E., Costa, D. P., Blackwell, S. B., Webb, P. M., & Houser, D. S. (2000). Foraging  
655 Ecology of Northern Elephant Seals. *Ecological Monographs*, 70(3), 353–382. doi: 10.1890/0012-  
656 9615(2000)070[0353:FEONES]2.0.CO;2
- 657 Boinski, S. (1988). Sex differences in the foraging behavior of squirrel monkeys in a seasonal habitat.  
658 *Behavioral Ecology and Sociobiology*, 23(3), 177–186.
- 659 Bolnick, D. I., Snowberg, L. K., Hirsch, P. E., Lauber, C. L., Org, E., Parks, B., ... Svanbäck, R. (2014).  
660 Individual diet has sex-dependent effects on vertebrate gut microbiota. *Nature Communications*, 5,  
661 4500. doi: 10.1038/ncomms5500



- 662 Bossart, G. D., Reidarson, T. H., Dierauf, L. A., & Duffield, D. A. (2001). Clinical pathology. In *CRC handbook*  
663 *of marine mammal medicine* (pp. 433–486). CRC Press.
- 664 Bray, J. R., & Curtis, J. T. (1957). An Ordination of the Upland Forest Communities of Southern Wisconsin.  
665 *Ecological Monographs*, 27, 325–349.
- 666 Callahan, Ben J., Sankaran, K., Fukuyama, J. A., McMurdie, P. J., & Holmes, S. P. (2016). Bioconductor  
667 Workflow for Microbiome Data Analysis: from raw reads to community analyses. *F1000Research*, 5,  
668 1492. doi: 10.12688/f1000research.8986.2
- 669 Callahan, Benjamin J., McMurdie, P. J., & Holmes, S. P. (2017). Exact sequence variants should replace  
670 operational taxonomic units in marker-gene data analysis. *The ISME Journal*, 11(12), 2639–2643. doi:  
671 10.1038/ismej.2017.119
- 672 Callahan, Benjamin J., McMurdie, P. J., Rosen, M. J., Han, A. W., Johnson, A. J. A., & Holmes, S. P. (2016).  
673 DADA2: High-resolution sample inference from Illumina amplicon data. *Nature Methods*, 13(7), 581–  
674 583. doi: 10.1038/nmeth.3869
- 675 Candon, S., Perez-Arroyo, A., Marquet, C., Valette, F., Foray, A.-P., Pelletier, B., ... Chatenoud, L. (2015).  
676 Antibiotics in early life alter the gut microbiome and increase disease incidence in a spontaneous mouse  
677 model of autoimmune insulin-dependent diabetes. *PLoS One*, 10(5), e0125448.
- 678 Cheesman, S. E., Neal, J. T., Mittge, E., Seredick, B. M., & Guillemin, K. (2011). Epithelial cell proliferation in  
679 the developing zebrafish intestine is regulated by the Wnt pathway and microbial signaling via Myd88.  
680 *Proceedings of the National Academy of Sciences*, 108(Supplement 1), 4570–4577.
- 681 Chen, H. J., & Gur, T. L. (2019). Intrauterine Microbiota: Missing, or the Missing Link? *Trends in*  
682 *Neurosciences*. doi: 10.1016/j.tins.2019.03.008
- 683 Cho, I., Yamanishi, S., Cox, L., Methé, B. A., Zavadil, J., Li, K., ... Teitler, I. (2012). Antibiotics in early life  
684 alter the murine colonic microbiome and adiposity. *Nature*, 488(7413), 621.
- 685 Clark, R. I., Salazar, A., Yamada, R., Fitz-Gibbon, S., Morselli, M., Alcaraz, J., ... William, W. J. (2015).  
686 Distinct shifts in microbiota composition during *Drosophila* aging impair intestinal function and drive  
687 mortality. *Cell Reports*, 12(10), 1656–1667.
- 688 Cox, L. M., Yamanishi, S., Sohn, J., Alekseyenko, A. V., Leung, J. M., Cho, I., ... Mahana, D. (2014). Altering  
689 the intestinal microbiota during a critical developmental window has lasting metabolic consequences.  
690 *Cell*, 158(4), 705–721.
- 691 David, L. A., Maurice, C. F., Carmody, R. N., Gootenberg, D. B., Button, J. E., Wolfe, B. E., ... Fischbach, M.  
692 A. (2014). Diet rapidly and reproducibly alters the human gut microbiome. *Nature*, 505(7484), 559.
- 693 Degnan, P. H., Pusey, A. E., Lonsdorf, E. V., Goodall, J., Wroblewski, E. E., Wilson, M. L., ... Ochman, H.  
694 (2012). Factors associated with the diversification of the gut microbial communities within  
695 chimpanzees from Gombe National Park. *Proceedings of the National Academy of Sciences*, 109(32),  
696 13034–13039.
- 697 Deutsch, C. J., Crocker, D. E., Costa, D. P., & Le Boeuf, B. J. (1994). Sex-and age-related variation in  
698 reproductive effort of northern elephant seals. In B.J. Le Boeuf & R. M. Laws (Eds.), *Elephant seals:*  
699 *Population ecology, behavior, and physiology* (pp. 169–210). University of California Press.

- 700 Diop, K., Raoult, D., Bretelle, F., & Fenollar, F. (2017). “Ezakiella massiliensis” sp. nov., a new bacterial  
701 species isolated from human female genital tract. *New Microbes and New Infections*, *15*, 16–17.
- 702 Duerr, C. U., & Hornef, M. W. (2012). The mammalian intestinal epithelium as integral player in the  
703 establishment and maintenance of host–microbial homeostasis. *Seminars in Immunology*, *24*, 25–35.  
704 Elsevier.
- 705 Edgar, R. C., & Flyvbjerg, H. (2015). Error filtering, pair assembly and error correction for next-generation  
706 sequencing reads. *Bioinformatics (Oxford, England)*, *31*(21), 3476–3482. doi:  
707 10.1093/bioinformatics/btv401
- 708 Flores-Morán, A., Banuet-Martínez, M., Elorriaga-Verplancken, F. R., García-Ortuño, L. E., Sandoval-Sierra, J.,  
709 & Acevedo-Whitehouse, K. (2017). Atypical red blood cells are prevalent in California sea lion pups  
710 born during anomalous sea surface temperature events. *Physiological and Biochemical Zoology*, *90*(5),  
711 564–574.
- 712 Frese, S. A., Parker, K., Calvert, C. C., & Mills, D. A. (2015). Diet shapes the gut microbiome of pigs during  
713 nursing and weaning. *Microbiome*, *3*(1), 28.
- 714 Fulde, M., & Hornef, M. W. (2014). Maturation of the enteric mucosal innate immune system during the  
715 postnatal period. *Immunological Reviews*, *260*(1), 21–34.
- 716 Giongo, A., Gano, K. A., Crabb, D. B., Mukherjee, N., Novelo, L. L., Casella, G., ... Hyöty, H. (2011). Toward  
717 defining the autoimmune microbiome for type 1 diabetes. *The ISME Journal*, *5*(1), 82.
- 718 Glad, T., Kristiansen, V. F., Nielsen, K. M., Brusetti, L., Wright, A.-D. G., & Sundset, M. A. (2010). Ecological  
719 Characterisation of the Colonic Microbiota in Arctic and Sub-Arctic Seals. *Microbial Ecology*, *60*(2),  
720 320–330. doi: 10.1007/s00248-010-9690-x
- 721 Goodrich, J. K., Davenport, E. R., Beaumont, M., Jackson, M. A., Knight, R., Ober, C., ... Ley, R. E. (2016).  
722 Genetic determinants of the gut microbiome in UK twins. *Cell Host & Microbe*, *19*(5), 731–743.
- 723 Gorvitovskaia, A., Holmes, S. P., & Huse, S. M. (2016). Interpreting Prevotella and Bacteroides as biomarkers  
724 of diet and lifestyle. *Microbiome*, *4*(1), 15.
- 725 Goslee, S. C., & Urban, D. L. (2007). The ecodist package for dissimilarity-based analysis of ecological data.  
726 *Journal of Statistical Software*, *22*(7), 1–19.
- 727 Grainger, J., Daw, R., & Wemyss, K. (2018). Systemic instruction of cell-mediated immunity by the intestinal  
728 microbiome. *FI000Research*, *7*.
- 729 Heijtz, R. D., Wang, S., Anuar, F., Qian, Y., Björkholm, B., Samuelsson, A., ... Pettersson, S. (2011). Normal  
730 gut microbiota modulates brain development and behavior. *Proceedings of the National Academy of*  
731 *Sciences*, *108*(7), 3047–3052.
- 732 Hindell, M. A., McMahon, C. R., Bester, M. N., Boehme, L., Costa, D., Fedak, M. A., ... Charrassin, J.-B.  
733 (2016). Circumpolar habitat use in the southern elephant seal: implications for foraging success and  
734 population trajectories. *Ecosphere*, *7*(5), e01213. doi: 10.1002/ecs2.1213
- 735 Hird, S. M. (2017). Evolutionary biology needs wild microbiomes. *Frontiers in Microbiology*, *8*, 725.
- 736 Ivarsson, E., Roos, S., Liu, H. Y., & Lindberg, J. E. (2014). Fermentable non-starch polysaccharides increases  
737 the abundance of Bacteroides–Prevotella–Porphyromonas in ileal microbial community of growing  
738 pigs. *Animal*, *8*(11), 1777–1787.

- 739 Klein, S. L., & Flanagan, K. L. (2016). Sex differences in immune responses. *Nature Reviews Immunology*,  
740 16(10), 626–638. doi: 10.1038/nri.2016.90
- 741 Klindworth, A., Pruesse, E., Schweer, T., Peplies, J., Quast, C., Horn, M., & Glöckner, F. O. (2013). Evaluation  
742 of general 16S ribosomal RNA gene PCR primers for classical and next-generation sequencing-based  
743 diversity studies. *Nucleic Acids Research*, 41(1), e1. doi: 10.1093/nar/gks808
- 744 Kozik, A. J., Nakatsu, C. H., Chun, H., & Jones-Hall, Y. L. (2019). Comparison of the fecal, cecal, and mucus  
745 microbiome in male and female mice after TNBS-induced colitis. *PLoS One*, 14(11).
- 746 Kraemer, P., & Gerlach, G. (2013). Demerelate: Functions to calculate relatedness on diploid genetic data. *R*  
747 *Package Version 0.8–0*.
- 748 Kretzmann, M. B., Costa, D. P., & Le Boeuf, B. J. (1993). Maternal Energy Investment in Elephant Seal Pups:  
749 Evidence for Sexual Equality? *The American Naturalist*, 141(3), 466–480. doi: 10.1086/285484
- 750 Kundu, P., Blacher, E., Elinav, E., & Pettersson, S. (2017). Our Gut Microbiome: The Evolving Inner Self. *Cell*,  
751 171(7), 1481–1493. doi: 10.1016/j.cell.2017.11.024
- 752 Kurilshikov, A., Wijmenga, C., Fu, J., & Zhernakova, A. (2017). Host genetics and gut microbiome: challenges  
753 and perspectives. *Trends in Immunology*, 38(9), 633–647.
- 754 Langille, M. G., Meehan, C. J., Koenig, J. E., Dhanani, A. S., Rose, R. A., Howlett, S. E., & Beiko, R. G.  
755 (2014). Microbial shifts in the aging mouse gut. *Microbiome*, 2(1), 50.
- 756 Larsen, J. M. (2017). The immune response to Prevotella bacteria in chronic inflammatory disease. *Immunology*,  
757 151(4), 363–374. doi: 10.1111/imm.12760
- 758 Lathrop, S. K., Bloom, S. M., Rao, S. M., Nutsch, K., Lio, C.-W., Santacruz, N., ... Hsieh, C.-S. (2011).  
759 Peripheral education of the immune system by colonic commensal microbiota. *Nature*, 478(7368), 250.
- 760 Le Boeuf, Burney J., & Laws, R. M. (1994). *Elephant seals: population ecology, behavior, and physiology*. Univ  
761 of California Press.
- 762 Le Boeuf, Burney J., & Ortiz, C. L. (1977). Composition of elephant seal milk. *Journal of Mammalogy*, 58(4),  
763 683–685.
- 764 Lewis, S., Benvenuti, S., Dall–Antonia, L., Griffiths, R., Money, L., Sherratt, T. N., ... Hamer, K. C. (2002).  
765 Sex-specific foraging behaviour in a monomorphic seabird. *Proceedings of the Royal Society of London*  
766 *B: Biological Sciences*, 269(1501), 1687–1693.
- 767 Ley, R. E., Hamady, M., Lozupone, C., Turnbaugh, P., Ramey, R. R., Bircher, J. S., ... Gordon, J. I. (2008).  
768 Evolution of mammals and their gut microbes. *Science (New York, N.Y.)*, 320(5883), 1647–1651. doi:  
769 10.1126/science.1155725
- 770 Loiselle, B. A., Sork, V. L., Nason, J., & Graham, C. (1995). Spatial genetic structure of a tropical understory  
771 shrub, *Psychotria officinalis* (Rubiaceae). *American Journal of Botany*, 1420–1425.
- 772 Love, M. I., Huber, W., & Anders, S. (2014). Moderated estimation of fold change and dispersion for RNA-seq  
773 data with DESeq2. *Genome Biology*, 15(12). doi: 10.1186/s13059-014-0550-8
- 774 Macpherson, A. J., & Harris, N. L. (2004). Interactions between commensal intestinal bacteria and the immune  
775 system. *Nature Reviews Immunology*, 4(6), 478.
- 776 Marcobal, A., & Sonnenburg, J. L. (2012). Human milk oligosaccharide consumption by intestinal microbiota.  
777 *Clinical Microbiology and Infection*, 18, 12–15.

- 778 Marcobal, Angela, Barboza, M., Sonnenburg, E. D., Pudlo, N., Martens, E. C., Desai, P., ... German, J. B.  
779 (2011). Bacteroides in the infant gut consume milk oligosaccharides via mucus-utilization pathways.  
780 *Cell Host & Microbe*, 10(5), 507–514.
- 781 Markle, J. G., Frank, D. N., Mortin-Toth, S., Robertson, C. E., Feazel, L. M., Rolle-Kampczyk, U., ... Danska, J.  
782 S. (2013). Sex differences in the gut microbiome drive hormone-dependent regulation of autoimmunity.  
783 *Science*, 339(6123), 1084–1088.
- 784 Martin, M. (2011). Cutadapt removes adapter sequences from high-throughput sequencing reads. *EMBnet*.  
785 *Journal*, 17(1), pp–10.
- 786 Maurice, C. F., Knowles, S. C., Ladau, J., Pollard, K. S., Fenton, A., Pedersen, A. B., & Turnbaugh, P. J. (2015).  
787 Marked seasonal variation in the wild mouse gut microbiota. *The ISME Journal*, 9(11), 2423–2434. doi:  
788 10.1038/ismej.2015.53
- 789 McFall-Ngai, M., Hadfield, M. G., Bosch, T. C. G., Carey, H. V., Domazet-Lošo, T., Douglas, A. E., ...  
790 Wernegreen, J. J. (2013). Animals in a bacterial world, a new imperative for the life sciences.  
791 *Proceedings of the National Academy of Sciences of the United States of America*, 110(9), 3229–3236.  
792 doi: 10.1073/pnas.1218525110
- 793 McMurdie, P. J., & Holmes, S. (2013). phyloseq: an R package for reproducible interactive analysis and  
794 graphics of microbiome census data. *PloS One*, 8(4), e61217.
- 795 McMurdie, P. J., & Holmes, S. (2014). Waste Not, Want Not: Why Rarefying Microbiome Data Is Inadmissible.  
796 *PLOS Computational Biology*, 10(4), e1003531. doi: 10.1371/journal.pcbi.1003531
- 797 Moeller, A. H., Li, Y., Ngole, E. M., Ahuka-Mundeke, S., Lonsdorf, E. V., Pusey, A. E., ... Ochman, H. (2014).  
798 Rapid changes in the gut microbiome during human evolution. *Proceedings of the National Academy of*  
799 *Sciences*, 111(46), 16431–16435.
- 800 Muegge, B. D., Kuczynski, J., Knights, D., Clemente, J. C., González, A., Fontana, L., ... Gordon, J. I. (2011).  
801 Diet Drives Convergence in Gut Microbiome Functions Across Mammalian Phylogeny and Within  
802 Humans. *Science*, 332(6032), 970–974. doi: 10.1126/science.1198719
- 803 Nakagawa, S., & Schielzeth, H. (2013). A general and simple method for obtaining R<sup>2</sup> from generalized linear  
804 mixed-effects models. *Methods in Ecology and Evolution*, 4, 133–142.
- 805 Nelson, T. M., Rogers, T. L., & Brown, M. V. (2013). The Gut Bacterial Community of Mammals from Marine  
806 and Terrestrial Habitats. *PLOS ONE*, 8(12), e83655. doi: 10.1371/journal.pone.0083655
- 807 Nelson, T. M., Rogers, T. L., Carlini, A. R., & Brown, M. V. (2013). Diet and phylogeny shape the gut  
808 microbiota of Antarctic seals: a comparison of wild and captive animals. *Environmental Microbiology*,  
809 15(4), 1132–1145. doi: 10.1111/1462-2920.12022
- 810 Numberger, D., Herlemann, D. P., Jürgens, K., Dehnhardt, G., & Schulz-Vogt, H. (2016). Comparative analysis  
811 of the fecal bacterial community of five harbor seals (*Phoca vitulina*). *MicrobiologyOpen*, 5(5), 782–  
812 792.
- 813 Oksanen, J., Guillaume Blanchet, F., Friendly, M., Kindt, R., Legendre, P., McGlimm, D., ... Wagner, H. (2017).  
814 vegan: Community Ecology Package (Version 2.4-5). Retrieved from [https://CRAN.R-](https://CRAN.R-project.org/package=vegan)  
815 [project.org/package=vegan](https://CRAN.R-project.org/package=vegan)
- 816 O’Toole, P. W., & Jeffery, I. B. (2015). Gut microbiota and aging. *Science*, 350(6265), 1214–1215.

- 817 Pajarillo, E. A. B., Chae, J.-P., Balolong, M. P., Kim, H. B., & Kang, D.-K. (2014). Assessment of fecal  
818 bacterial diversity among healthy piglets during the weaning transition. *The Journal of General and*  
819 *Applied Microbiology*, 60(4), 140–146.
- 820 Pantoja-Feliciano, I. G., Clemente, J. C., Costello, E. K., Perez, M. E., Blaser, M. J., Knight, R., & Dominguez-  
821 Bello, M. G. (2013). Biphasic assembly of the murine intestinal microbiota during early development.  
822 *The ISME Journal*, 7(6), 1112.
- 823 Paradis, E. (2010). pegas: an R package for population genetics with an integrated–modular approach.  
824 *Bioinformatics (Oxford, England)*, 26, 419–420.
- 825 Pascal, V., Pozuelo, M., Borruel, N., Casellas, F., Campos, D., Santiago, A., ... Machiels, K. (2017). A  
826 microbial signature for Crohn’s disease. *Gut*, 66(5), 813–822.
- 827 Patel, N. B., Tito, R. Y., Obregón-Tito, A. J., O’Neal, L., Trujillo-Villaroel, O., Marin-Reyes, L., ... Uchino, Y.  
828 (2015). *Ezakiella peruensis* gen. nov., sp. nov. isolated from human fecal sample from a coastal  
829 traditional community in Peru. *Anaerobe*, 32, 43–48.
- 830 Perez-Muñoz, M. E., Arrieta, M.-C., Ramer-Tait, A. E., & Walter, J. (2017). A critical assessment of the “sterile  
831 womb” and “in utero colonization” hypotheses: implications for research on the pioneer infant  
832 microbiome. *Microbiome*, 5(1), 48.
- 833 Perofsky, A. C., Lewis, R. J., Abondano, L. A., Di Fiore, A., & Meyers, L. A. (2017). Hierarchical social  
834 networks shape gut microbial composition in wild Verreaux’s sifaka. *Proc. R. Soc. B*, 284(1868),  
835 20172274.
- 836 Quast, C., Pruesse, E., Yilmaz, P., Gerken, J., Schweer, T., Yarza, P., ... Glöckner, F. O. (2012). The SILVA  
837 ribosomal RNA gene database project: improved data processing and web-based tools. *Nucleic Acids*  
838 *Research*, 41(D1), D590–D596. doi: 10.1093/nar/gks1219
- 839 R Core Team. (n.d.). *R: A language and environment for statistical computing*. R Foundation for Statistical  
840 *Computing*. Retrieved from <https://www.R-project.org/>
- 841 Reiter, J., Stinson, N. L., & Boeuf, B. J. L. (1978). Northern elephant seal development: The transition from  
842 weaning to nutritional independence. *Behavioral Ecology and Sociobiology*, 3(4), 337–367. doi:  
843 10.1007/BF00303199
- 844 Ren, T., Boutin, S., Humphries, M. M., Dantzer, B., Gorrell, J. C., Coltman, D. W., ... Wu, M. (2017). Seasonal,  
845 spatial, and maternal effects on gut microbiome in wild red squirrels. *Microbiome*, 5(1), 163.
- 846 Round, J. L., & Mazmanian, S. K. (2009). The gut microbiota shapes intestinal immune responses during health  
847 and disease. *Nature Reviews Immunology*, 9(5), 313.
- 848 Russell, S. L., Gold, M. J., Hartmann, M., Willing, B. P., Thorson, L., Wlodarska, M., ... McNagny, K. M.  
849 (2012). Early life antibiotic-driven changes in microbiota enhance susceptibility to allergic asthma.  
850 *EMBO Reports*, 13(5), 440–447.
- 851 Smith, P., Willemsen, D., Popkes, M., Metge, F., Gandiwa, E., Reichard, M., & Valenzano, D. R. (2017).  
852 Regulation of life span by the gut microbiota in the short-lived African turquoise killifish. *Elife*, 6,  
853 e27014.

- 854 Stephens, W. Z., Burns, A. R., Stagaman, K., Wong, S., Rawls, J. F., Guillemin, K., & Bohannan, B. J. (2016).  
855 The composition of the zebrafish intestinal microbial community varies across development. *The ISME*  
856 *Journal*, 10(3), 644.
- 857 Stoffel, M. A., Nakagawa, S., & Schielzeth, H. (2017). rptR: repeatability estimation and variance  
858 decomposition by generalized linear mixed-effects models. *Methods in Ecology and Evolution*, 8(11),  
859 1639–1644. doi: 10.1111/2041-210X.12797
- 860 Tarka, M., Guenther, A., Niemelä, P. T., Nakagawa, S., & Noble, D. W. (2018). Sex differences in life history,  
861 behavior, and physiology along a slow-fast continuum: a meta-analysis. *Behavioral Ecology and*  
862 *Sociobiology*, 72(8), 132.
- 863 Tung, J., Barreiro, L. B., Burns, M. B., Grenier, J.-C., Lynch, J., Grieneisen, L. E., ... Archie, E. A. (2015).  
864 Social networks predict gut microbiome composition in wild baboons. *Elife*, 4, e05224.
- 865 Turnbaugh, P. J., Bäckhed, F., Fulton, L., & Gordon, J. I. (2008). Diet-induced obesity is linked to marked but  
866 reversible alterations in the mouse distal gut microbiome. *Cell Host & Microbe*, 3(4), 213–223.
- 867 Videvall, E., Song, S. J., Bensch, H. M., Strandh, M., Engelbrecht, A., Serfontein, N., ... Cornwallis, C. K.  
868 (2019). Major shifts in gut microbiota during development and its relationship to growth in ostriches.  
869 *Molecular Ecology*. doi: 10.1111/mec.15087
- 870 Wilson, D., & Mittermeier, R. (2014). *Handbook of the Mammals of the World*. Retrieved from  
871 <http://books.google.de/books?id=UCwbnwEACAAJ&dq=isbn:9788496553934&hl=&cd=1&source=gb>  
872 [s\\_api](#)
- 873 Yochem, P. K., Stewart, B. S., Mazet, J. A., & Boyce, W. M. (2008). Hematologic and serum biochemical  
874 profile of the northern elephant seal (*Mirounga angustirostris*): variation with age, sex, and season.  
875 *Journal of Wildlife Diseases*, 44(4), 911–921.
- 876 Zhu, L., Wu, Q., Dai, J., Zhang, S., & Wei, F. (2011). Evidence of cellulose metabolism by the giant panda gut  
877 microbiome. *Proceedings of the National Academy of Sciences*, 108(43), 17714–17719.
- 878 Zilber-Rosenberg, I., & Rosenberg, E. (2008). Role of microorganisms in the evolution of animals and plants:  
879 the hologenome theory of evolution. *FEMS Microbiology Reviews*, 32(5), 723–735.
- 880 Zoetendal, E. G., Akkermans, A. D., Akkermans-van Vliet, W. M., de Visser, J. A. G., & de Vos, W. M. (2001).  
881 The host genotype affects the bacterial community in the human gastrointestinal tract. *Microbial*  
882 *Ecology in Health and Disease*, 13(3), 129–134.
- 883
- 884
